# Supplementary material
Source: publisher figshare collection journal article supplement (https://acs.figshare.com/ndownloader/files/21947991)
Supplement: Supplementary file 1 [file 21947991]

# **Polyethylenimine-grafted-corncob as a multifunctional biomaterial for removing heavy metal ions and killing bacteria from water**

Qin Meng <sup>1,2</sup>; Shengdong Wu <sup>2</sup>; Chong Shen <sup>1,2,\*</sup>

## Figure S1

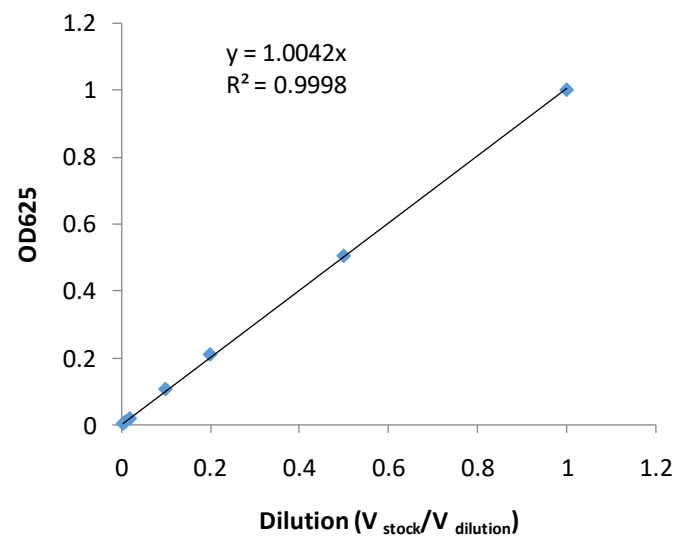

Figure S1 OD625 vs dilution ration curve of *P. aeruginosa*. The TSB medium without any bacteria was set as blank in detection of OD625 by microreader. The OD625 of *P. aeruginosa* suspension in TSB medium was adjusted to 1 by fresh TSB as stock solution. Then the stock solution was diluted at ratio of 1:1, 1:5, 1:10, 1:50; 1:100 and 1:200 with TSB medium before detection.
